# Supplementary material
Source: HighWire-hosted journal article supplement (https://tobaccocontrol.bmj.com/highwire/filestream/165821/field_highwire_adjunct_files/0/tc-2022-057735supp001_data_supplement.pdf)

## SUPPLEMENTARY MATERIAL

### 1. Sensitivity analysis using various sets of price elasticity

|                                                                                   | Lower bound elasticity |                  |                  | Main analysis  |                  |                  | Upper bound elasticity |                  |                  |
|-----------------------------------------------------------------------------------|------------------------|------------------|------------------|----------------|------------------|------------------|------------------------|------------------|------------------|
|                                                                                   | 2020 tax level         | 30% tax increase | 45% tax increase | 2020 tax level | 30% tax increase | 45% tax increase | 2020 tax level         | 30% tax increase | 45% tax increase |
| Price elasticity of kretek cigarette                                              | -0.231                 | -0.231           | -0.231           | -0.800         | -0.800           | -0.800           | -0.840                 | -0.840           | -0.840           |
| Price elasticity of white cigarette                                               | -0.300                 | -0.300           | -0.300           | -0.338         | -0.338           | -0.338           | -0.967                 | -0.967           | -0.967           |
| Cross-price elasticity                                                            | 0.163                  | 0.163            | 0.163            | 0.163          | 0.163            | 0.163            | 0.163                  | 0.163            | 0.163            |
|                                                                                   |                        |                  |                  |                |                  |                  |                        |                  |                  |
| Tax increase (kretek)                                                             | 24%                    | 30%              | 45%              | 24%            | 30%              | 45%              | 24%                    | 30%              | 45%              |
| Tax increase (white)                                                              | 27%                    | 30%              | 45%              | 27%            | 30%              | 45%              | 27%                    | 30%              | 45%              |
| Price increase (kretek)                                                           | 21%                    | 24%              | 33%              | 21%            | 24%              | 33%              | 21%                    | 24%              | 33%              |
| Price increase (white)                                                            | 23%                    | 25%              | 35%              | 23%            | 25%              | 35%              | 23%                    | 25%              | 35%              |
| Changes in cigarette consumption                                                  | -1.09%                 | -1.59%           | -2.04%           | -12.40%        | -14.84%          | -19.98%          | -13.87%                | -16.50%          | -22.24%          |
| Changes in cigarette spending                                                     | 19.55%                 | 22.38%           | 30.29%           | 5.91%          | 5.94%            | 6.49%            | 4.10%                  | 3.84%            | 3.41%            |
| Changes in tax revenue                                                            |                        |                  |                  |                |                  |                  |                        |                  |                  |
| Cigarette excise revenue                                                          | 22.58%                 | 27.91%           | 42.00%           | 8.68%          | 10.81%           | 16.18%           | 6.71%                  | 8.52%            | 12.68%           |
| Subnational tax revenue                                                           | 22.58%                 | 27.91%           | 42.00%           | 8.68%          | 10.81%           | 16.18%           | 6.71%                  | 8.52%            | 12.68%           |
| VAT revenue                                                                       | 19.55%                 | 22.38%           | 30.29%           | 5.91%          | 5.94%            | 6.49%            | 4.10%                  | 3.84%            | 3.41%            |
| Changes in total cigarette tax revenue                                            | 22.09%                 | 27.03%           | 40.13%           | 8.23%          | 10.03%           | 14.63%           | 6.29%                  | 7.77%            | 11.20%           |
| <b>Impact in Simulation A (<i>The optimal government spending allocation</i>)</b> |                        |                  |                  |                |                  |                  |                        |                  |                  |
| Impact on output (Rp trillion)                                                    | 122.15                 | 150.19           | 224.48           | 46.22          | 56.95            | 84.15            | 35.51                  | 44.47            | 65.17            |
| Impact on income (Rp trillion)                                                    | 36.58                  | 44.72            | 66.35            | 13.61          | 16.56            | 24.12            | 10.39                  | 12.81            | 18.43            |
| Impact on employment (thousand)                                                   | 531.27                 | 661.38           | 1,004.04         | 208.30         | 263.29           | 400.27           | 162.23                 | 209.51           | 317.88           |

## 2. Sensitivity analysis using a different assumption of tax pass-through

|                                                                                   | Tax under-shift |                  |                  | Full tax pass-through |                  |                  | Tax over-shift |                  |                  |
|-----------------------------------------------------------------------------------|-----------------|------------------|------------------|-----------------------|------------------|------------------|----------------|------------------|------------------|
|                                                                                   | 2020 tax level  | 30% tax increase | 45% tax increase | 2020 tax level        | 30% tax increase | 45% tax increase | 2020 tax level | 30% tax increase | 45% tax increase |
| Tax increase (kretek)                                                             | 24%             | 30%              | 45%              | 24%                   | 30%              | 45%              | 24%            | 30%              | 45%              |
| Tax increase (white)                                                              | 27%             | 30%              | 45%              | 27%                   | 30%              | 45%              | 27%            | 30%              | 45%              |
| Price increase (kretek)                                                           | 7%              | 11%              | 19%              | 21%                   | 24%              | 33%              | 44%            | 47%              | 56%              |
| Price increase (white)                                                            | 21%             | 22%              | 32%              | 23%                   | 25%              | 35%              | 58%            | 60%              | 70%              |
| Changes in cigarette consumption                                                  | -2.50%          | -4.93%           | -10.07%          | -12.40%               | -14.84%          | -19.98%          | -24.71%        | -27.15%          | -32.28%          |
| Changes in cigarette spending                                                     | 5.03%           | 5.73%            | 7.82%            | 5.91%                 | 5.94%            | 6.49%            | 8.69%          | 7.73%            | 6.04%            |
| Changes in tax revenue                                                            |                 |                  |                  |                       |                  |                  |                |                  |                  |
| Cigarette excise revenue                                                          | 20.83%          | 23.58%           | 30.42%           | 8.68%                 | 10.81%           | 16.18%           | -6.53%         | -5.15%           | -1.62%           |
| Subnational tax revenue                                                           | 20.83%          | 23.58%           | 30.42%           | 8.68%                 | 10.81%           | 16.18%           | -6.53%         | -5.15%           | -1.62%           |
| VAT revenue                                                                       | 5.03%           | 5.73%            | 7.82%            | 5.91%                 | 5.94%            | 6.49%            | 8.69%          | 7.73%            | 6.04%            |
| Changes in total cigarette tax revenue                                            | 18.30%          | 20.72%           | 26.81%           | 8.23%                 | 10.03%           | 14.63%           | -4.10%         | -3.09%           | -0.39%           |
| <b>Impact in Simulation A (<i>The optimal government spending allocation</i>)</b> |                 |                  |                  |                       |                  |                  |                |                  |                  |
| Impact on output (Rp trillion)                                                    | 106.81          | 120.92           | 156.21           | 46.22                 | 56.95            | 84.15            | -28.87         | -22.34           | -5.40            |
| Impact on income (Rp trillion)                                                    | 30.12           | 34.10            | 44.12            | 13.61                 | 16.56            | 24.12            | -6.59          | -4.94            | -0.55            |
| Impact on employment (thousand)                                                   | 523.76          | 592.75           | 763.71           | 208.30                | 263.29           | 400.27           | -190.89        | -152.65          | -57.33           |

Note: Tax under shift assumption is based on tax pass-through coefficients estimated by Prasetyo & Adrison, (2020). Meanwhile, the over-shift assumption is estimated based on level of cigarette tax pass-through in 2020 (MoF's regulation No. 152/PMK.010/2019)

### 3. Analysing tax pass-through by year and by cigarette segment

The trends in actual HJE and estimated HJE over the past 10-15 years show that the tax pass-through fluctuates year-to-year. The estimated HJE is obtained by assuming the actual weighted average excise tax per year and an annual increase in NOT (net-of-tax) price equal to annual inflation. In the case of machine-made cigarettes, the industry over-shifted the tax during 2007-2010 for SKM (machine-made kretek cigarettes) and in 2007-2008 for SPM (machine-made white cigarettes), then under-shifted until 2015, and over-shifted again in 2016 and 2017 (Figure 1 and Figure 2). On the other hand, in the case of SKT (hand-rolled kretek cigarettes) (see Figure 3), the industry has been consistently over-shifting the tax onto the consumers.

Figure 1. Actual versus estimated HJE, SKM

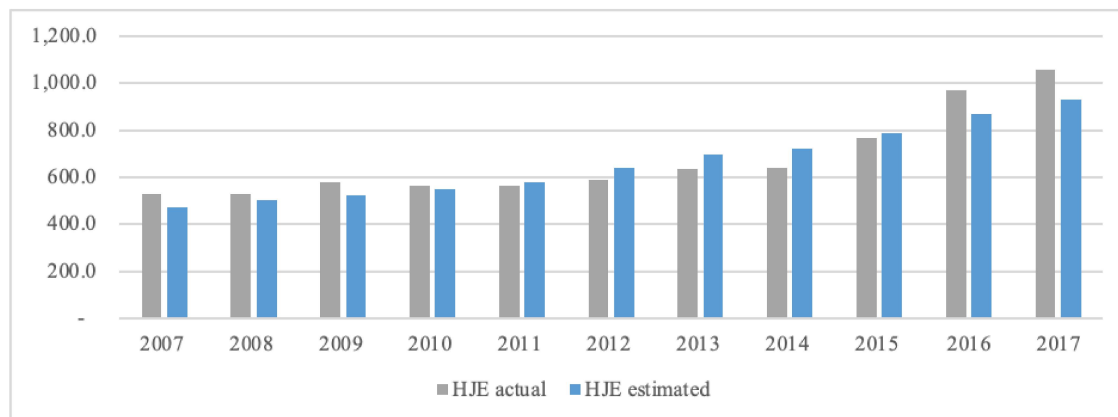

Figure 2. Actual versus estimated HJE, SPM

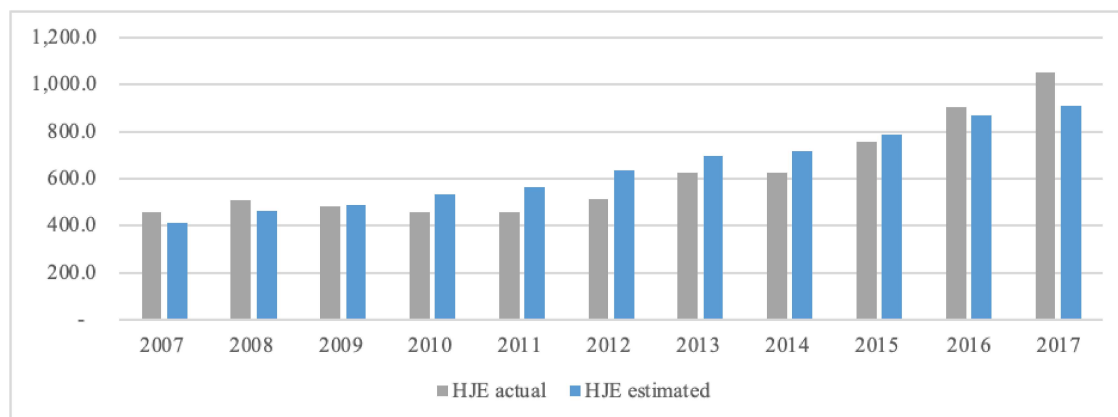

Figure 3. Actual versus estimated HJE, SKT

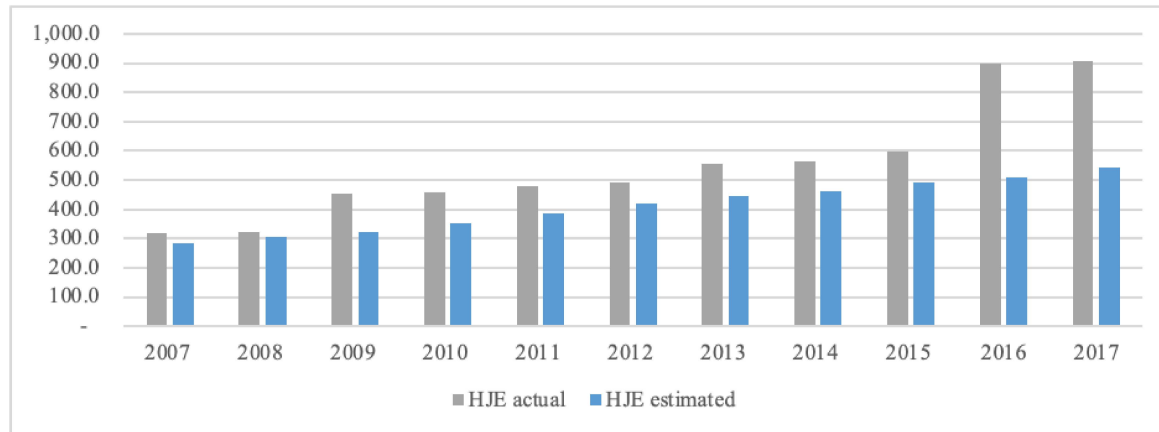

Supplement: tc-2022-057735supp001_data_supplement.pdf [file tc-2022-057735supp001_data_supplement.pdf]
